# Supplementary material for: A sandwiched Co4-added polyoxometalate for efficient visible light-driven hydrogen evolution
Source: Royal Society of Chemistry journal article supplement (doi:10.1039/d4dt00885e), 2024-01-01
Supplement: d4dt00885e1.pdf [file d4dt00885e1.pdf]

## **A sandwiched Co<sub>4</sub>-added Polyoxometalate for Efficient Visible-light-driven Hydrogen Evolution**

Zhen-Wen Wang, Chong-An Chen and Guo-Yu Yang\*

*MOE Key Laboratory of Cluster Science, School of Chemistry and Chemical Engineering, Beijing Institute of Technology, Beijing 102488, China*

Address correspondence to Guo-Yu Yang, [ygy@bit.edu.cn](mailto:ygy@bit.edu.cn)

# Content

## 1. Experimental section

## 2. Supporting Figures

**Figure S1** (a) Asymmetric unit of **1**; (b) Schematic diagram of  $\{\text{Co}_4\}$  existing in **1** and the distance between Co-Co; (c) Polyhedral view of anion clusters  $\{\text{Co}_4\text{GeW}_9\}$ .

**Figure S2** The stacking diagram of **1** along the a-axis direction.

**Figure S3** Synthesized and simulated PXRD pattern of **1**.

**Figure S4** The FT-IR of **1**.

**Figure S5** Thermogravimetric analysis curve of **1**.

**Figure S6** Transient photocurrent responses (I-t curves) of ITO conductive glass and ITO conductive glass loaded with compound **1**.

**Figure S7** Photocatalytic  $\text{H}_2$  evolution with different concentrations of TEOA (5–25 mM) after 10 hours of reaction. Conditions: white light (400–800 nm, 10W),  $[\text{Ir}(\text{ppy})_2(\text{dtbbpy})][\text{PF}_6]$  (0.2 mM), catalyst of **1** (3 mg), 3 mL of  $\text{CH}_3\text{CN}/\text{DMF}$  (1/3), and  $\text{H}_2\text{O}$  (2 M) deaerated with  $\text{Ar}/\text{CH}_4$  (4/1).

**Figure S8** The powder X-ray diffraction patterns for **1** before and after reaction.

**Figure S9** The FTIR spectra for **1** before and after reaction.

**Figure S10** The PXRD patterns after three times recycle of catalyst **1**.

**Figure S11** The FT-IR spectra after three times recycle of catalyst **1**.

**Figure S12** Proposed mechanism for visible-light-driven  $\text{H}_2$  evolution catalyzed by **1** with oxidative and reductive quenching mechanism.



## 1. Eperimental section

FT-IR spectra were measured by using a Nicolet iS10 FT-IR spectrometer in the range of 400–4000  $\text{cm}^{-1}$  with KBr pallets. Powder X-ray diffraction (PXRD) patterns were recorded on a Bruker D8 Advance XRD diffractometer with Cu  $\text{K}\alpha$  radiation ( $\lambda = 1.54056 \text{ \AA}$ ). Thermogravimetric analyses were conducted in under  $\text{N}_2$  flowing on a Mettler-Toledo TGA/DSC 1000 with the heating rate of  $10 \text{ }^\circ\text{C min}^{-1}$  from 25 to  $1000 \text{ }^\circ\text{C}$ . UV-Vis absorption spectra were obtain using a SP-1901 UV-Vis spectrophotometer.  $\text{H}_2$  was analysed using a gas chromatograph (GC9790 II) with a TCD and a  $5 \text{ \AA}$  molecular sieve column ( $3 \text{ m} \times 3 \text{ mm}$ ) with Ar as the carrier gas. Electrochemical measurements (transient photocurrent response, Mott–Schottky spots) were using an electrochemical workstation CHI 670E. A three-electrode system was employed in a cell with an Ag/AgCl as the reference electrode, a carbon rod as the counter electrode, and the indium tin oxide (ITO) coated glass as the working electrode. The electrolyte solution is  $\text{Na}_2\text{SO}_4$  (0.5 M). The area of working electrodes was set constant at  $1.0 \times 1.0 \text{ cm}^2$ . Photocatalytic reactions were carried out by Beijing Perfectlight Multi-channel photochemical reaction system PCX-50C equipped with white light source (electric power: 10 W). ICP-OES test was test on Agilent 725-ES. Field emission scanning electron microscopies (FE-SEM) were performed on a Ultra Plus model Zeiss microscope operating at an accelerating voltage of 10.0 kV.

## 2. Supporting Figures

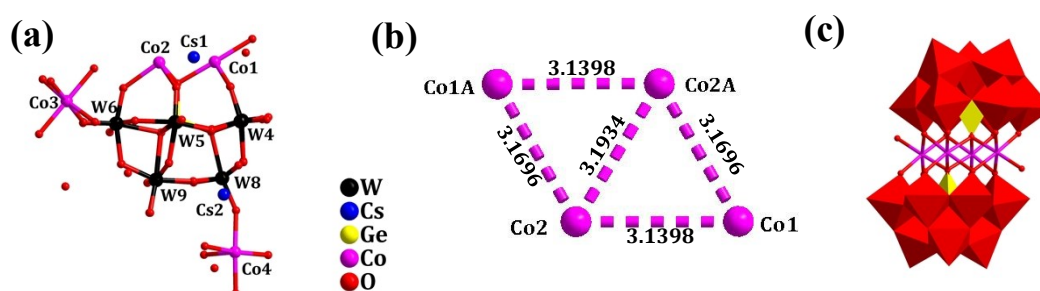

**Figure S1** (a) Asymmetric unit of **1**; (b) Schematic diagram of  $\{\text{Co}_4\}$  existing in **1** and the distance between Co-Co; (c) Polyhedral view of anion clusters  $\{\text{Co}_4\text{GeW}_9\}$ .

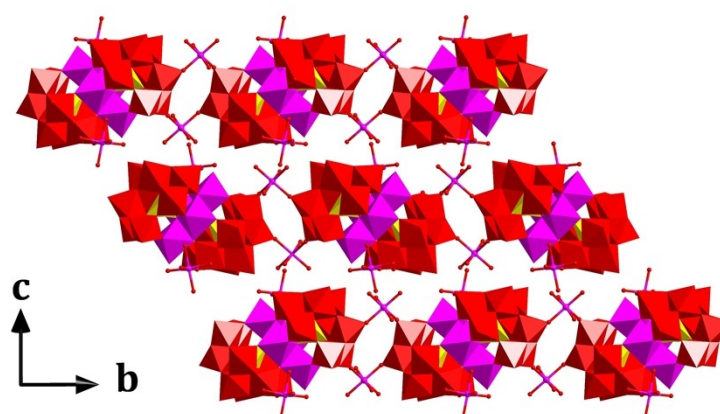

**Figure S2** The stacking diagram of **1** along the a-axis direction.

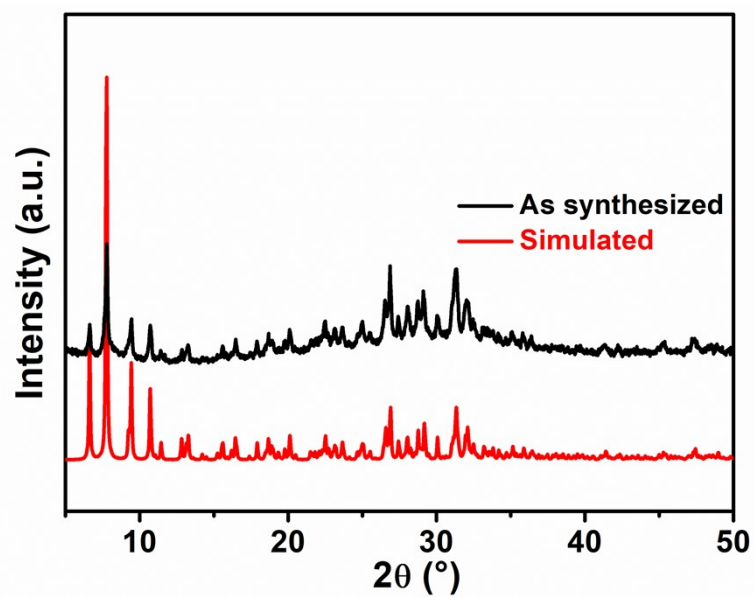

Figure S3 Synthesized and simulated PXRD pattern of 1.

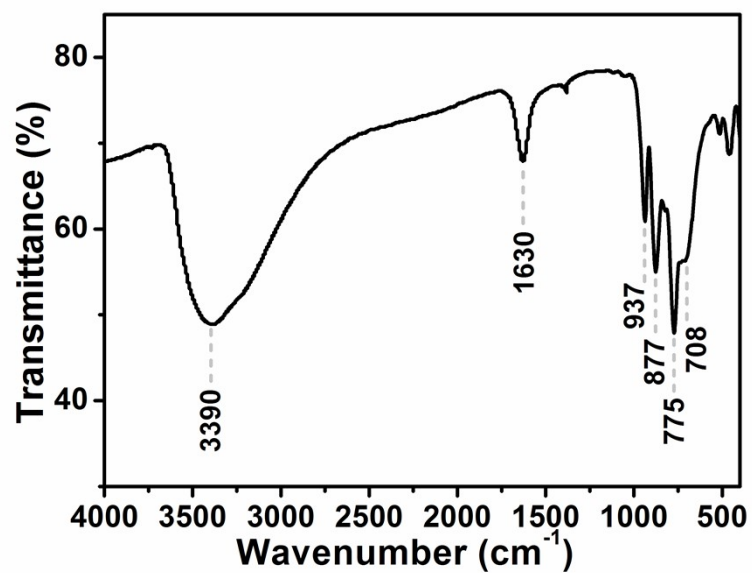

Figure S4 The FT-IR of 1.

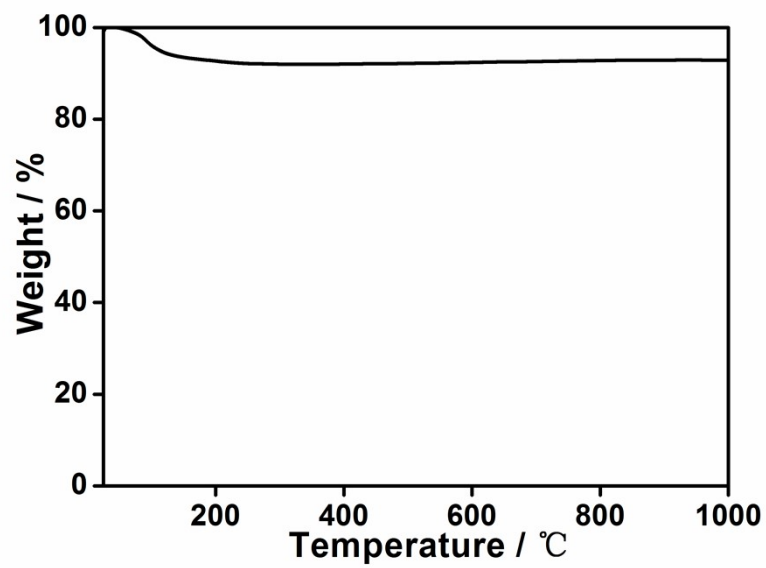

Figure S5 Thermogravimetric analysis curve of 1.

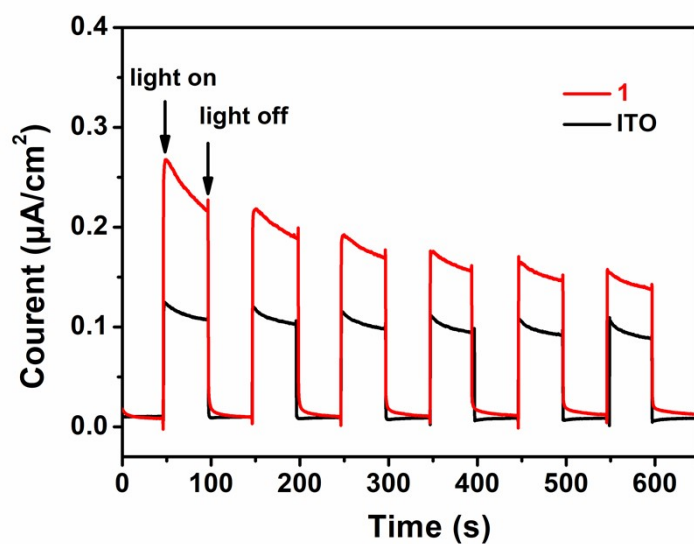

Figure S6 Transient photocurrent responses (I-t curves) of ITO conductive glass and ITO conductive glass loaded with compound 1.

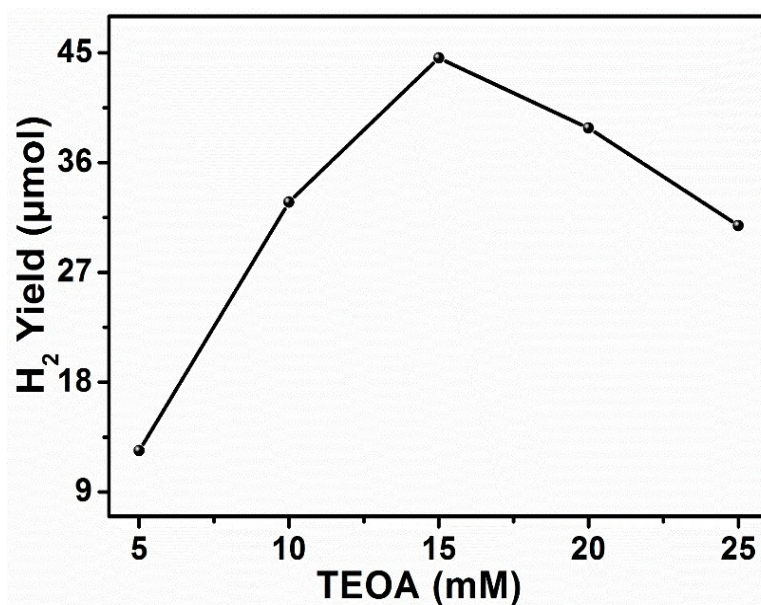

**Figure S7** Photocatalytic H<sub>2</sub> evolution with different concentrations of TEOA (5–25 mM) after 10 hours of reaction. Conditions: white light (400–800 nm, 10W), [Ir(ppy)<sub>2</sub>(dtbbpy)][PF<sub>6</sub>] (0.2 mM), catalyst of **1** (3 mg), 3 mL of CH<sub>3</sub>CN/DMF (1/3), and H<sub>2</sub>O (2 M) deaerated with Ar/CH<sub>4</sub> (4/1).

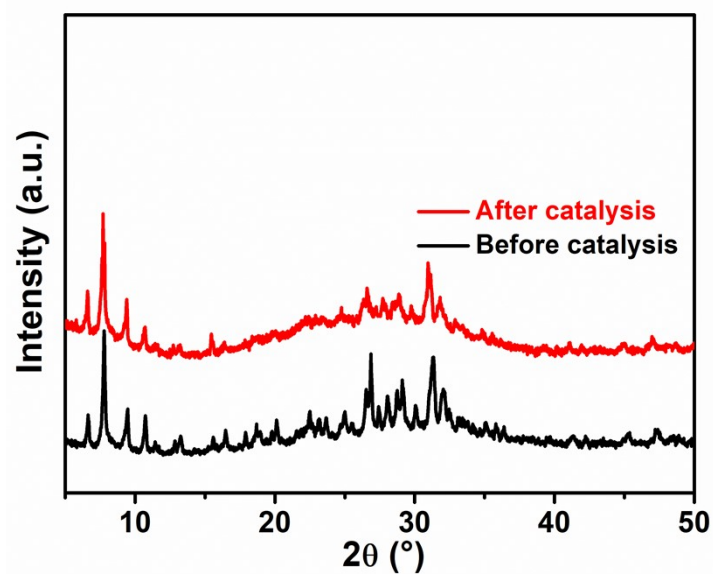

**Figure S8** The powder X-ray diffraction patterns for **1** before and after reaction.

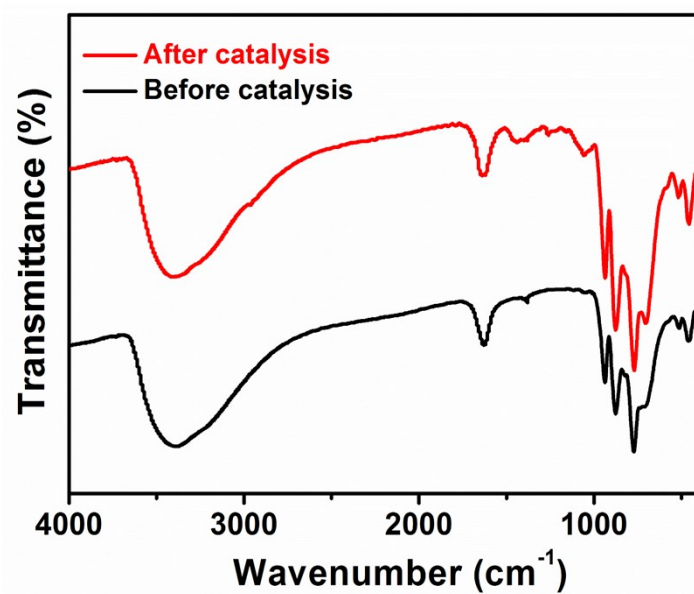

Figure S9 The FTIR spectra for 1 before and after reaction.

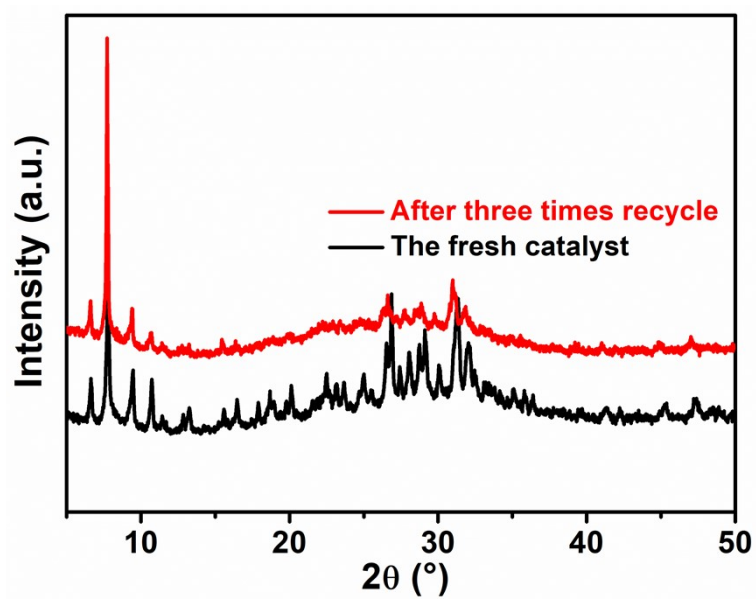

Figure S10 The PXRD patterns after three times recycle of catalyst 1.



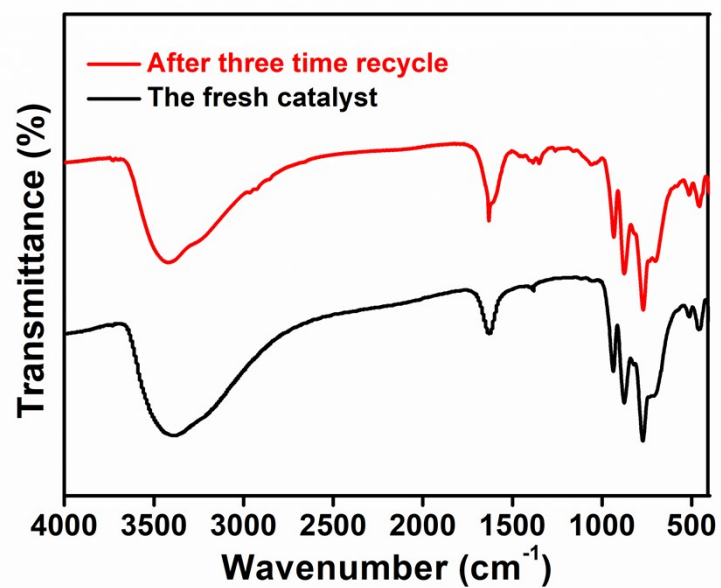

Figure S11 The FT-IR spectra after three times recycle of catalyst 1.

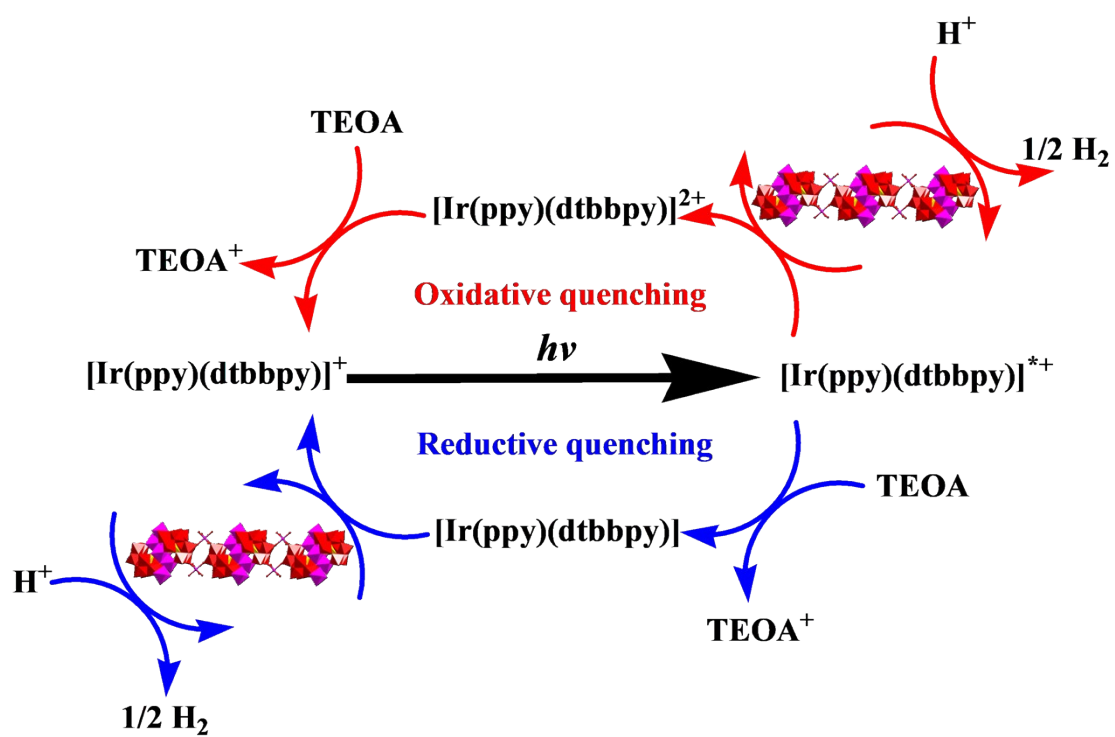

Figure S13 Proposed mechanism for visible-light-driven H<sub>2</sub> evolution catalyzed by 1 with oxidative and reductive quenching mechanism.
